# Supplementary material
Source: PubMed Central journal article supplement (PMC3320194)
Supplement: supp_pp.111.192328_192328Supplementary_data_6.pdf [file supp_pp.111.192328_192328Supplementary_data_6.pdf]

**a****Inner tissues**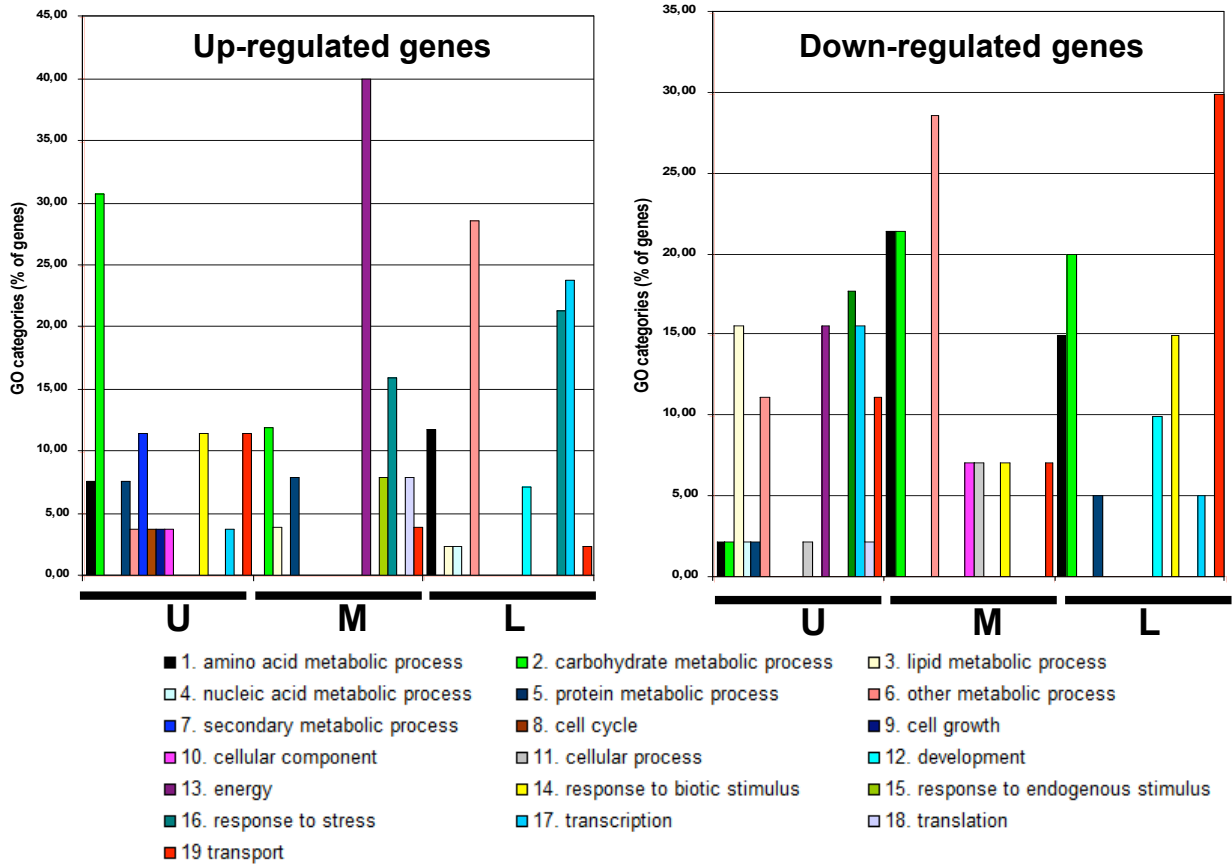**b****Outer tissues**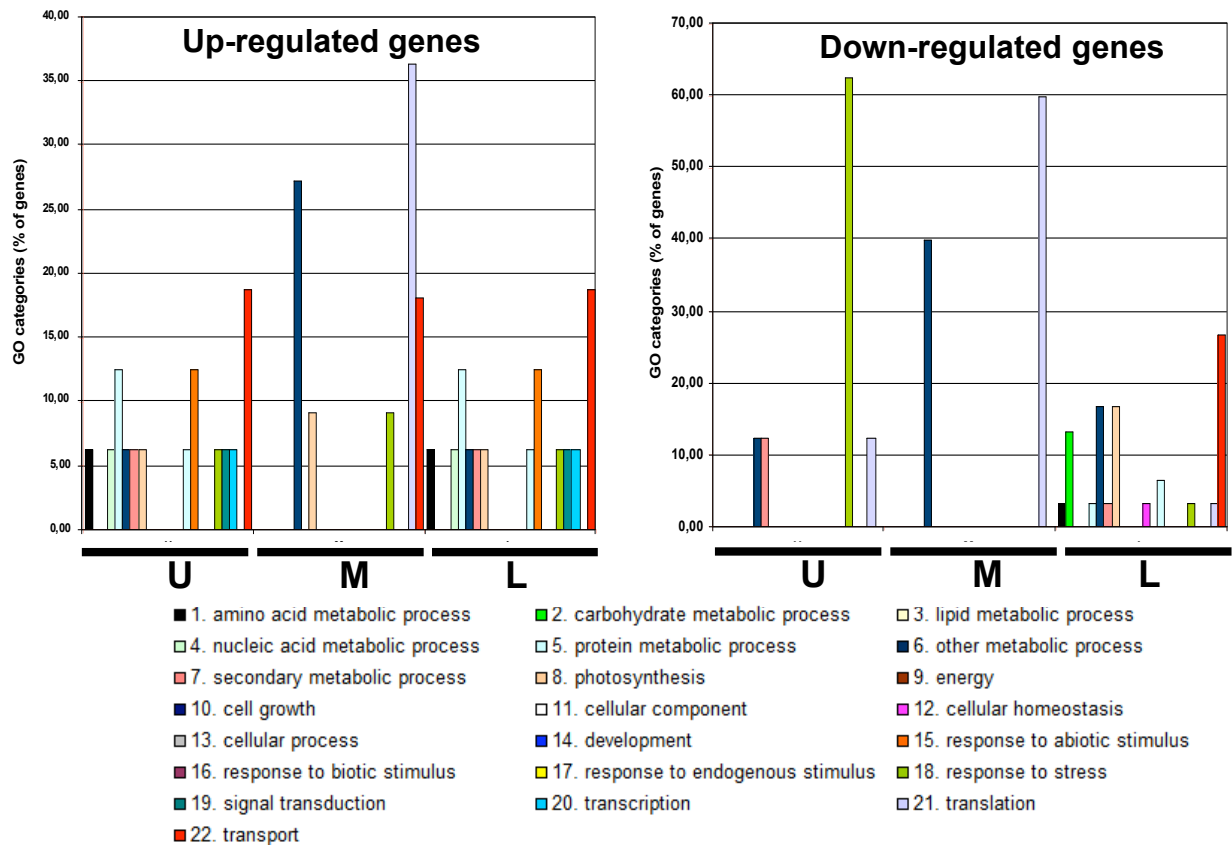

**Supplementary data 6.** Gene ontology (GO) biological processes up-/down-regulated in inner-/outer stem tissues; **a)** inner stem tissues, percentage genes in different GO biological process categories that are up-regulated ( $\log_2\text{ratio} > 1.5$ , left) and down-regulated ( $\log_2\text{ratio} < 1.5$ , right) in upper (U), middle (M) and lower L) stem samples as compared to expression levels in whole inner stem tissue sample. **b)** outer stem tissues, percentage genes in different GO biological process categories that are up-regulated ( $\log_2\text{ratio} > 1.5$ , left) and down-regulated ( $\log_2\text{ratio} < 1.5$ , right) in upper (U), middle (M) and lower L) stem samples as compared to expression levels in whole outer stem tissue sample.
